# Supplementary material for: Theoretical and Experimental Studies on the Evidence of 1,3-β-Glucan in Marennine of Haslea ostrearia
Source: MDPI journal article supplement (doi:10.3390/molecules28155625), 2023-07-25
Supplement: s1 [file s1]

## Supporting Information

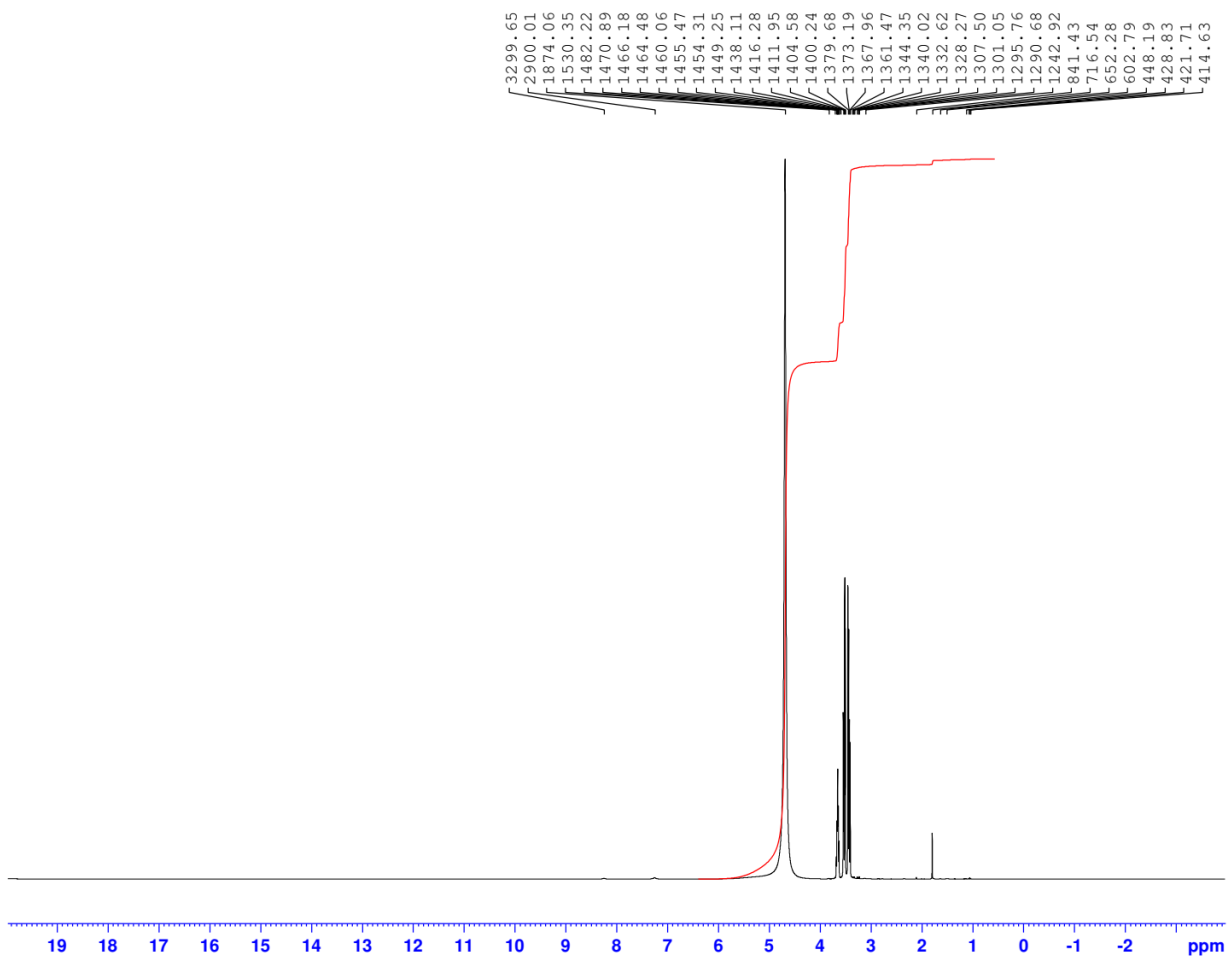

**Figure S1.** The  $^1\text{H}$ -NMR spectrum of marennine after enzymatic hydrolysis. The peaks at 3.5 and 4.7 ppm correspond to glycerol and HDO, respectively.

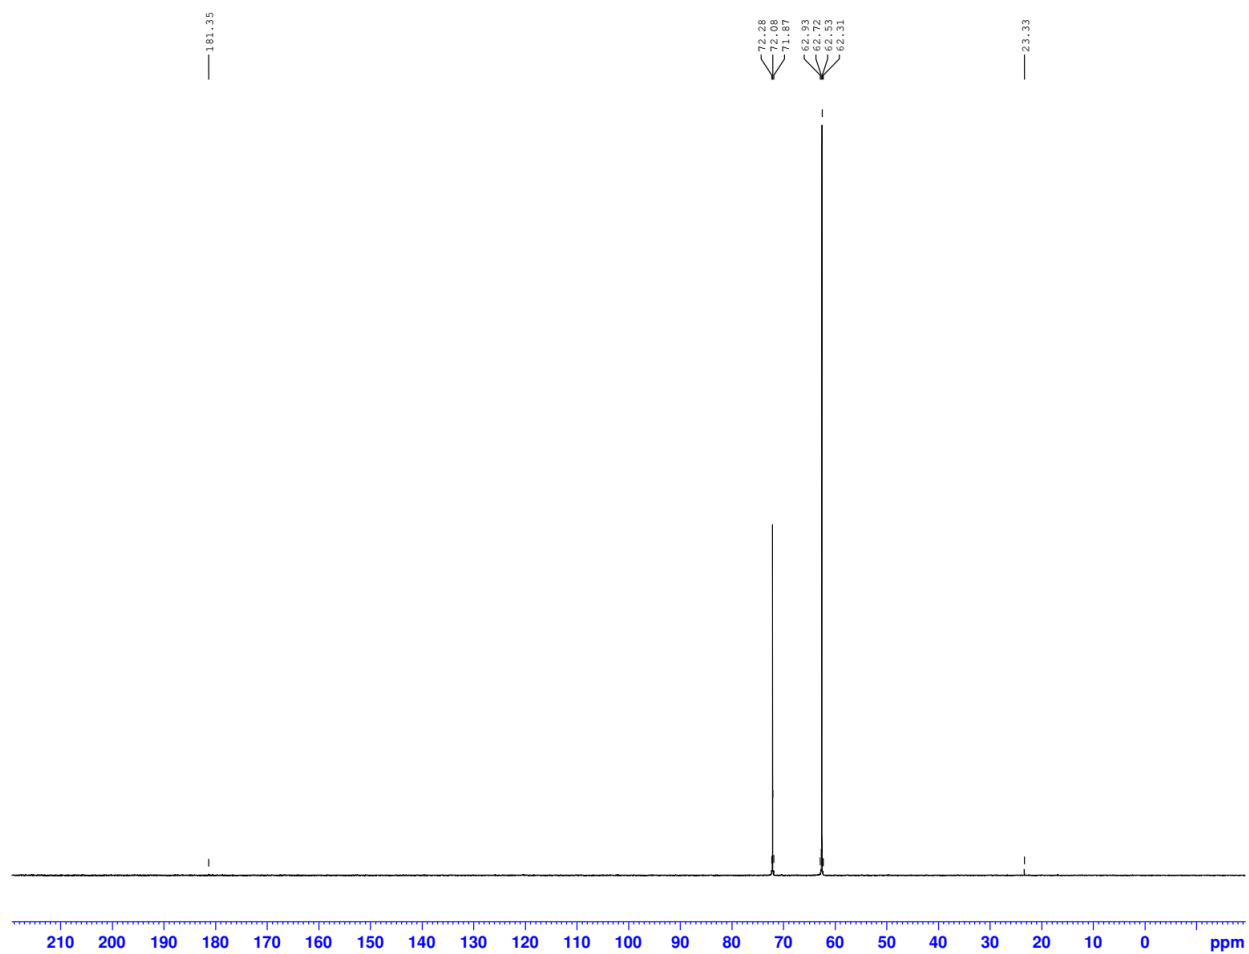

**Figure S2.** The  $^{13}\text{C}$ -NMR spectrum of marennine after enzymatic hydrolysis. The peaks at 60 – 75 ppm correspond to glycerol.

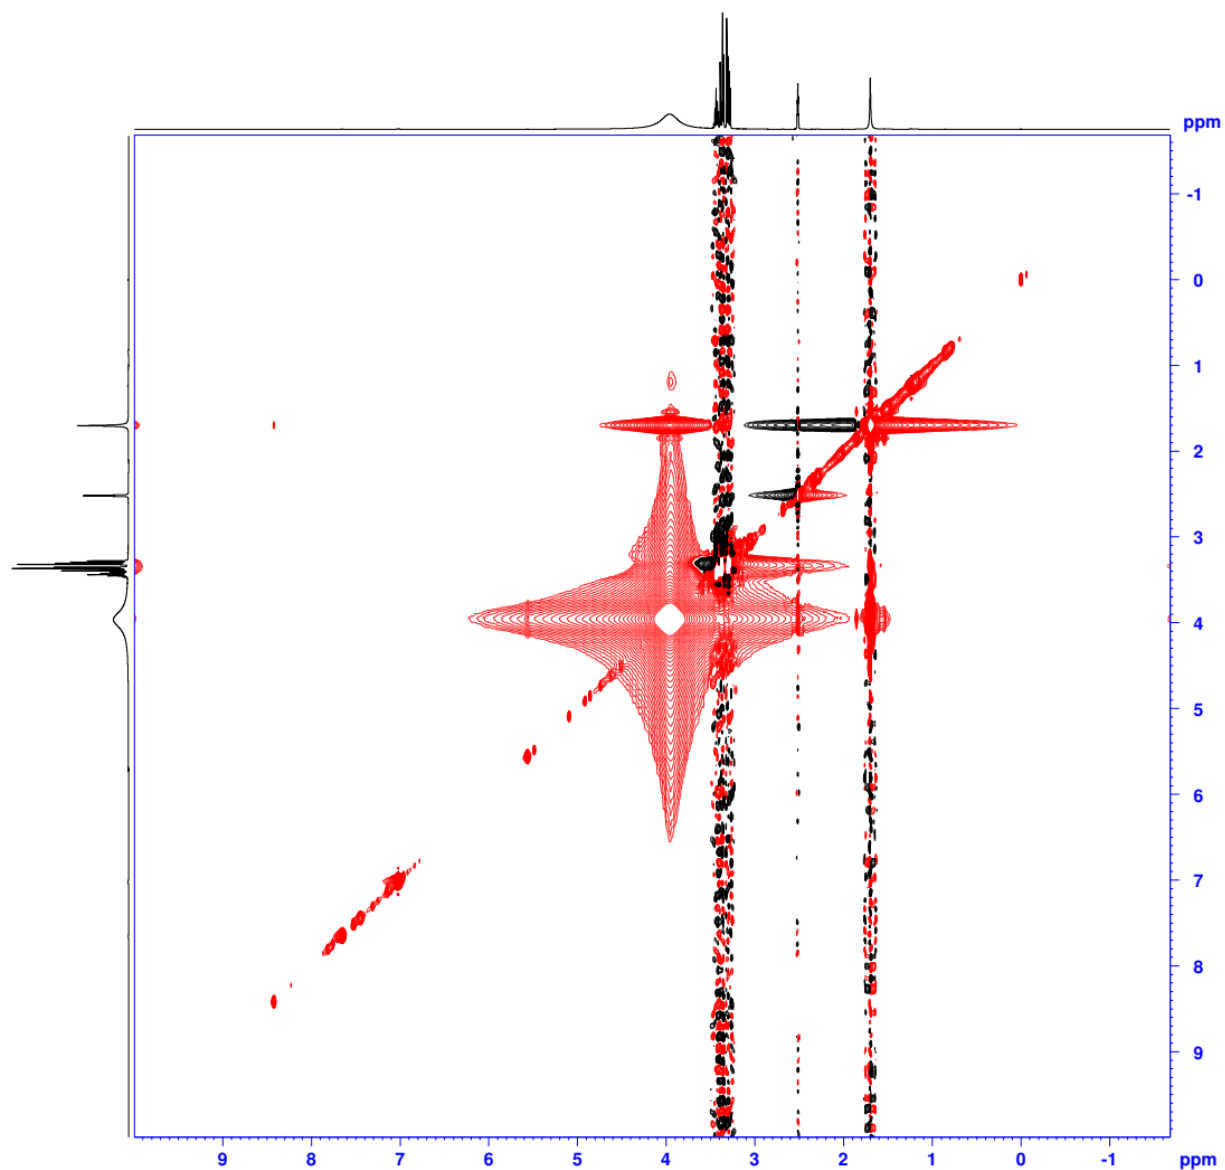

**Figure S3.** 2D NOESY spectrum of marennine after enzymatic hydrolysis.
